# Supplementary material for: Investigating the influence of mineral content changes on mechanical properties through ligament insertion
Source: Frontiers journal article supplement (doi:10.3389/fragi.2025.1556577), 2025-07-07
Supplement: Data_Sheet_1.pdf [file Data_Sheet_1.pdf]

## Supplementary Material

### 1 Supplementary Figures:

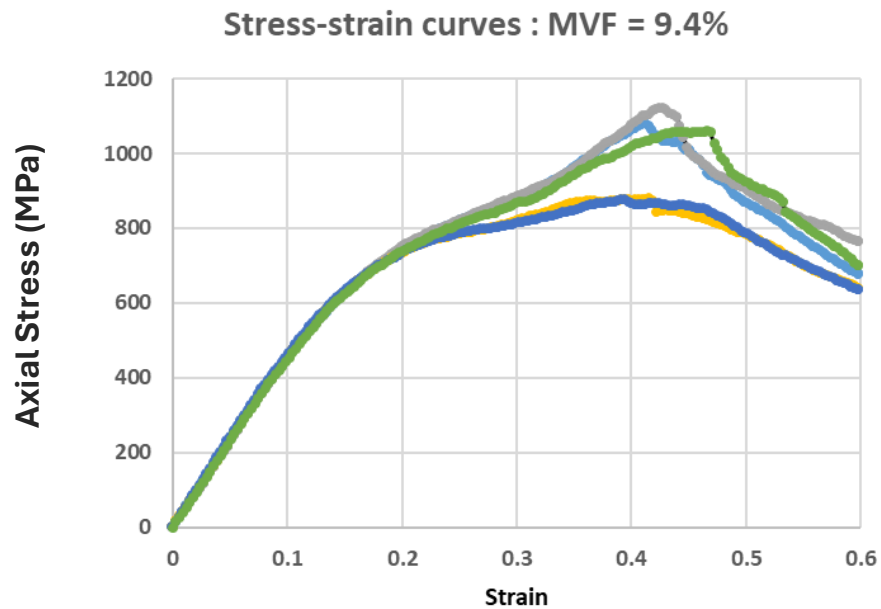

**Supplementary Figure 1.** Stress-strain field for collagen fibril for 9.4% mineral fractions.

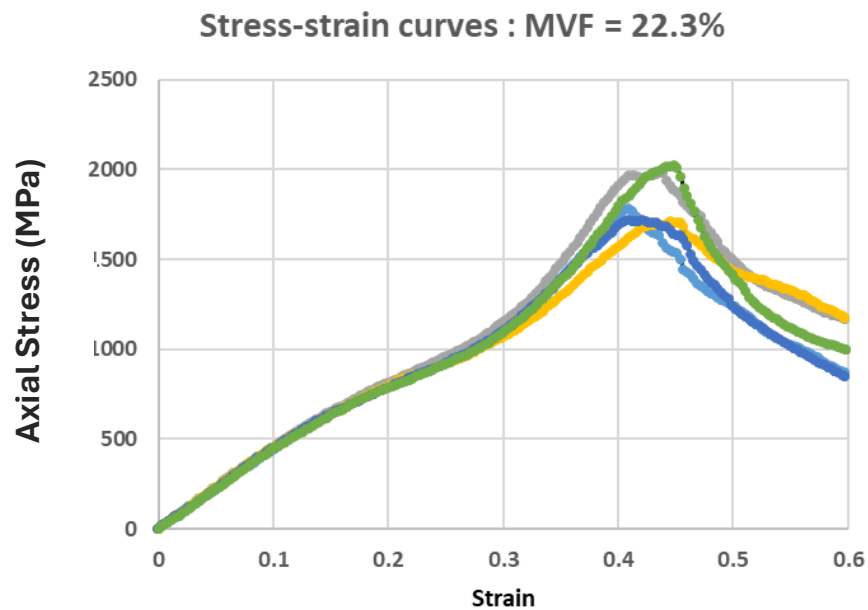

**Supplementary Figure 2.** Stress-strain field for collagen fibril for 22.3% mineral fractions.

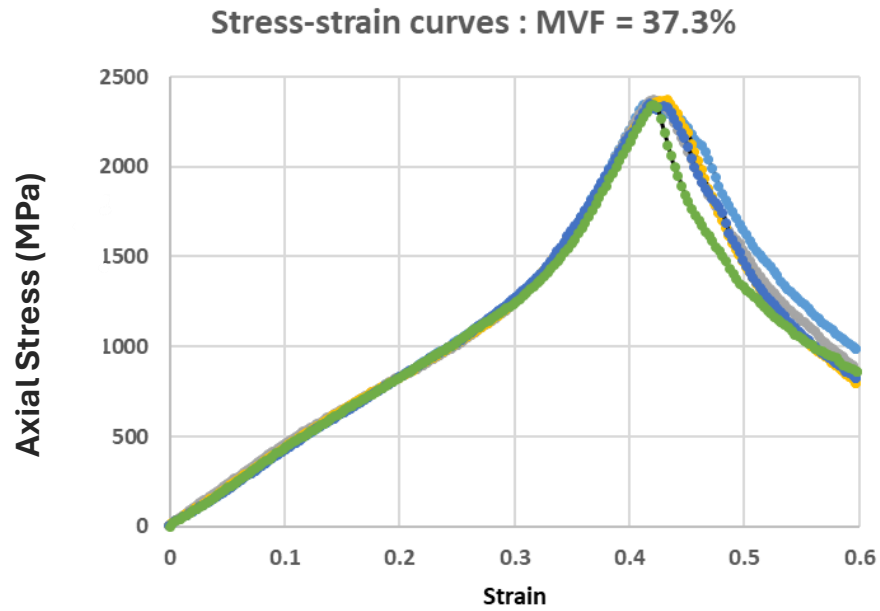

**Supplementary Figure 3.** Stress-strain field for collagen fibril for 37.3% mineral fractions.

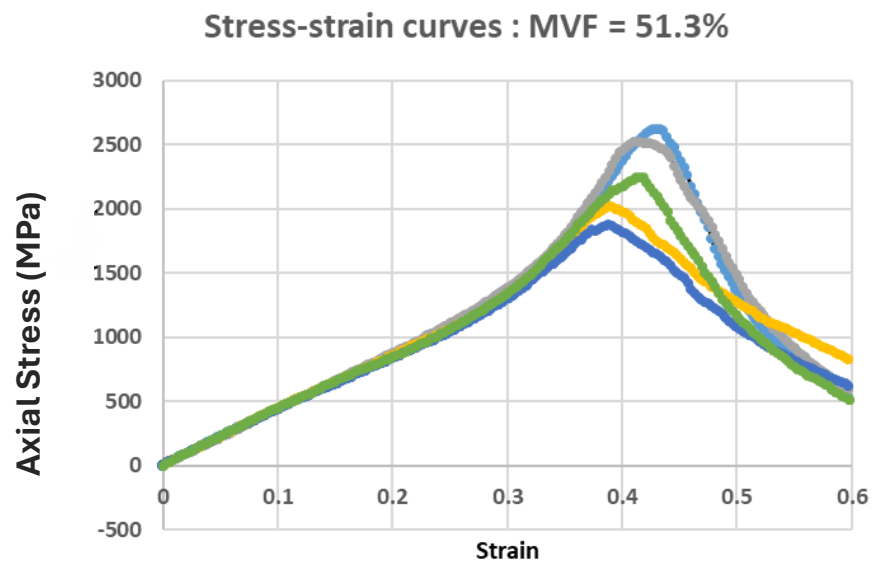

**Supplementary Figure 4.** Stress-strain field for collagen fibril for 51.3% mineral fractions.

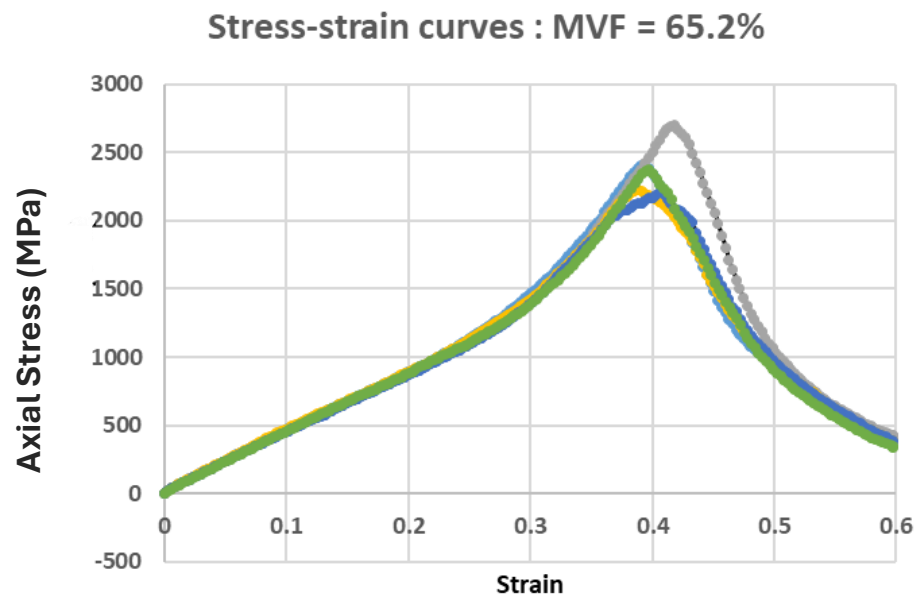

**Supplementary Figure 5.** Stress-strain field for collagen fibril for 65.2% mineral fractions.
